# Supplementary material for: Single molecule diffusion on hard, soft and fluid surfaces
Source: Royal Society of Chemistry journal article supplement (doi:10.1039/c2ra00754a), 2012-01-01

## Single Molecule Diffusion on Hard, Soft and Fluid Surfaces

Shengqin Wang, Benxin Jing and Yingxi Zhu\*

Department of Chemical and Biomolecular Engineering

University of Notre Dame, Notre Dame, Indiana 46556, USA

### Supplemental Information

To determine the lateral diffusion of lipid bilayers, fluorescent 1,2-dioleoyl-sn-glycero-3-phosphoethanolamine-N-(lissamine rhodamine B sulfonyl) ammonium (LR-PE), purchased from Avanti Polar Lipids, is used to mix with L- $\alpha$ -phosphatidylcholine ( $\alpha$ -PC) at a molar ratio of 1:10<sup>5</sup> to form a smooth and uniform lipid bilayer, whose morphology is displayed in Supplemental Fig. 1b. By using fluorescence correlation spectroscopy (FCS), an auto-correlation function of LR-PE in  $\alpha$ -PC lipid bilayer in Phosphate buffered saline (PBS) buffer solution is obtained as shown in Fig. 1c, yielding  $D_s = 3.0 \mu\text{m}^2/\text{s}$  in PBS aqueous solution as the lateral diffusion coefficient of  $\alpha$ -PC lipid bilayer by fitting  $G(\tau)$  with Eq 1.

**Supplemental Figure 1.** (a) The chemical structure of  $\alpha$ -PC and LR-PE, (b) fluorescence micrograph of mixed  $\alpha$ -PC and LR-PE lipid bilayer, and (c) measured normalized  $G(\tau)$  by  $G(0)$  of LR-PE in the mixed lipid bilayer.

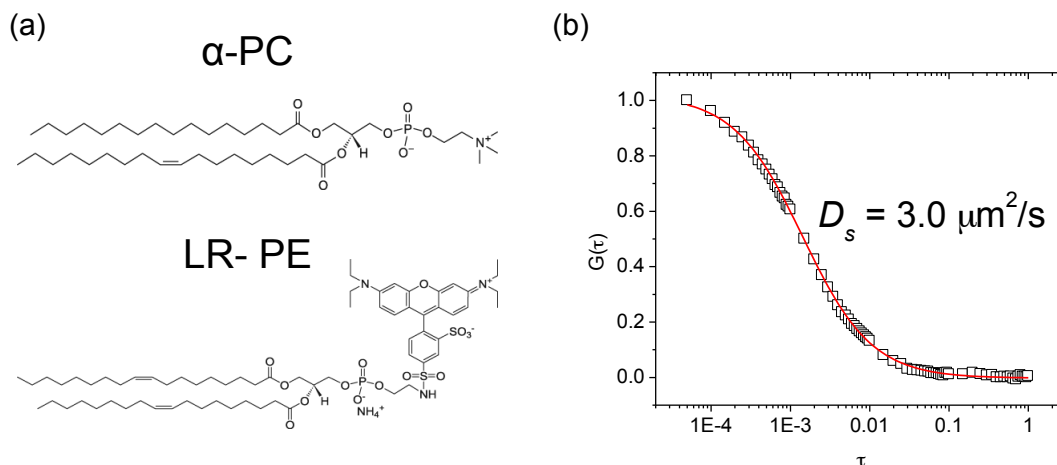

Supplement: c2ra00754a.pdf [file c2ra00754a.pdf]
